# Supplementary material
Source: PubMed Central journal article supplement (PMC3358915)
Supplement: 1200894109_pnas.1200894109_SI.pdf [file 1200894109_pnas.1200894109_SI.pdf]

# Supporting Information

Boitard et al. 10.1073/pnas.1200894109

## SI Material and Methods

**Strains and Culture Conditions.** Strains used in this study are described in Table S2. Glucose concentration varied from 20 to 200 g/L. For single-cell experiments based on leucine auxotrophy, cells were grown in nonrestrictive medium (synthetic defined, SD all) until they reached exponential phase. They were then washed in restrictive medium (SD-L) three times and incubated for 2 h at 30 °C in SD-L. They were then encapsulated inside droplets and stored at 30 °C.

For single-cell experiments based on the thermosensitive mutant *cdc28*, cells were grown in SD-all at permissive temperature (30 °C) until they reached exponential phase. They were then encapsulated and maintained at restrictive temperature (38 °C).

**Formulation.** The continuous phase is a mixture of 52% (wt/wt) of mineral oil (Sigma) and 48% (wt/wt) of highly purified perfluorooctane (F6H8; Fluoron GmbH). To stabilize the emulsion, we added 0.5% (wt/wt) span80 (Sigma Aldrich) and 0.25% (wt/wt) of ArlacelP125 (Croda).

F6H8 acts as a bad solvent for the surfactants which promotes adhesion between the droplets, creating a surfactant bilayer at the contact interface (Fig. S1).

Above 50% (wt/wt) of F6H8, ArlacelP125 is not soluble in the oil mixture anymore. The main advantage compared to a nonadhesive emulsion is that the distance between drops is totally controlled by the adhesion, which only depends on the formulation. In the case of nonadhesive droplets the distance (thickness of the oil film) depends on the compaction of the emulsion, which is poorly reproducible from one experiment to the next. Hence, the use of adhesive emulsion provides robustness to the procedure.

**Device Manufacturing and Operation.** For the droplet generation, we used a flow-focusing design (Fig. S3A). Flows were controlled with syringe pumps (Harvard Apparatus). The typical flow rates for the aqueous phase was 80–100  $\mu\text{L}/\text{min}$  and for the continuous phase 400  $\mu\text{L}/\text{h}$ . To compact the droplets inside the incubation chamber, we extracted some of the continuous phase with syringe pump in withdraw mode at  $-350 \mu\text{L}/\text{h}$ . We obtained a compact two-dimensional network as illustrated in Fig. S3C.

The 25- $\mu\text{m}$ -deep incubation chamber (Fig. S2B) was custom-made by gluing microscope glass slides together, separated by 25- $\mu\text{m}$ -thin wires (Omega). Ports of the chamber were drilled

in the top slide and glued with Nanoport (Upchurch Scientific) to provide for a connection from the microfluidic chip to the chamber. To avoid wetting of the drops on the walls of the chamber, this latter was silanized with a perfluorosilane (Sigma). Once the chamber was filled with the droplets, the chip was disconnected and the chamber plugged.

**Image Analysis.** Images were processed with custom software written in Matlab. After a thresholding step, only the contour of the droplets were kept from the binary images (Fig. S7A.a and A.b). Volume of the pancake-shaped droplets was then calculated according to the following equation:  $V = 2\pi r(R-r)^2 + \pi^2 r^2 \left[ R - r \left( 1 - \frac{3}{4\pi} \right) \right]$  where  $r = \frac{h}{2}$  depends on the height of the chamber. The different parameters are illustrated in Fig. S7A.c. As illustrated in Fig. S7B, for isolated empty drops, we observed a change in volume during the first 200 min of the experiment. This effect was seen on every drop of the network, and we suppose it resulted from the relaxation of the system. To correct for this volume variation unrelated to biological processes, we selected an empty isolated drop as a reference droplet and used its volume to normalize the other droplets. Hence,  $V_{\text{corrected}} = V(t)V_{\text{ref}}^0/V_{\text{ref}}$ . This correction is particularly important for single-cell experiments where volume variation is very small.

**Cell Size Measurement.** To estimate cell size inside the droplets, we measured segmented cell boundaries as described in Fig. S6 where size = (area)<sup>3/2</sup>. The error on the measured area was 15 pixels, resulting in an error of 58 pixel<sup>3/2</sup> for the size.

Cell size distributions were deduced (Fig. S6) with the following coefficient of variation: CV(2N) = 30%; CV(3N) = 20%; CV(4N) = 23%.

**Osmolarity Measurements.** Because the flux between drops was set by osmolarity gradients, we measured the initial osmolarity of the media with a cryogenic osmometer (Gonotec; Osmomat 030). For example, an SD medium containing  $C_g = 100 \text{ g/mol} = 555 \text{ mosmol/L}$  had an osmolarity  $C_0 = C_g + C_{ng} = 712 \text{ mosmol/L}$ . The “1X” corresponds to the normal concentration of nonglucose nutrients. The “2X” stands for twice the normal concentration. The concentration of glucose in each medium is given in g/L. The L stands for “without leucine.”

1. Schmitz CHJ, Rowat AC, Köster S, Weitz DA (2009) Dropspots: A picoliter array in a microfluidic device. *Lab Chip* 9:44–49.

| Medium (SD)                          | 1X-20 g/L | 1X-20 g/L-L | 1X-50 g/L | 1X-100 g/L | 2X-100 g/L | 1X-150 g/L | 1X-200 g/L |
|--------------------------------------|-----------|-------------|-----------|------------|------------|------------|------------|
| Osmolarity (mosmol.L <sup>-1</sup> ) | 254       | 250         | 429       | 772        | 849        | 1,090      | 1,502      |

## Diffusion Model and Parameters

**Without Cells.** A semipermeable membrane separates two reservoirs containing, respectively,  $c_1$  and  $c_2$  g/L of glucose. According to Fick's law, the flow of a water molecule across the membrane is given by  $j = -D_m \nabla c_m$  where  $D_m$  is the diffusion coefficient of water in the membrane and  $\nabla c_m$  is the concentration gradient across the membrane. According to Overton's rule,  $\nabla c_m = K_p \frac{c_2 - c_1}{d}$  where  $K_p$  is the partition coefficient of the non-diffusible molecule (glucose, for instance) inside the membrane

and  $d$  the membrane thickness. We can write  $j = P(c_2 - c_1) = P \nabla c$  where  $P = \frac{D_m K_p}{d}$  is the permeability. The amount of water molecules that cross the surface  $A$  during time  $dt$  is  $jAdt = \frac{dv}{v_w}$ , where  $dv$  is the volume change and  $v_w$  is the molar volume of water. The water flow across the surface of diffusion  $A$  is then written as  $\frac{dv}{dt} = -PA v_w \Delta c$ . As illustrated in Fig. S1, the area  $A$  of the adhesive patch between the droplets is mainly fixed by the formulation of the emulsion. So, we finally write  $\frac{dv}{dt} = -F v_w \Delta c$  where  $F$  is the flow parameter that is proportional







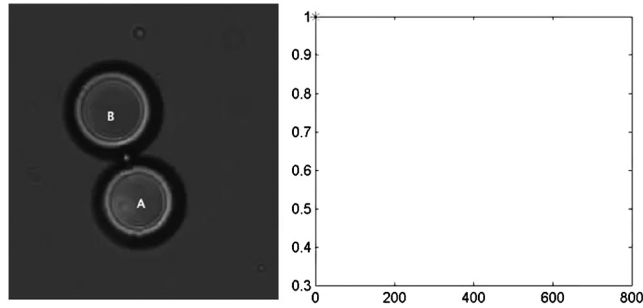

**Movie S1.** Osmotic ripening: model experiment. A 5 g/L glucose-containing droplet (A) is emptying itself in a 20 g/L glucose-containing droplet (B). The plot on the right side represents the normalized volume evolution of the 5 g/L glucose-containing droplet. Water equilibrates the concentrations diffusing from the less concentrated droplet toward the most concentrated one.

[Movie S1 \(MOV\)](#)

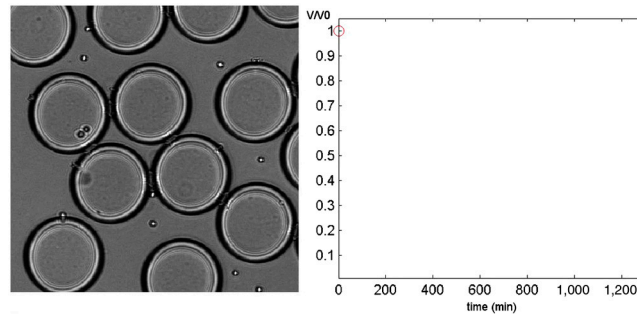

**Movie S2.** Osmotic ripening: yeast experiment. Budding *Saccharomyces cerevisiae* (GY613) cell encapsulated in a 50 g/L glucose-containing synthetic-defined culture medium droplet. As the cell divides, the droplet is emptying itself in the surrounding nonoccupied droplets. The plot on the right side represents the normalized volume evolution of the yeast-containing droplet.

[Movie S2 \(MOV\)](#)

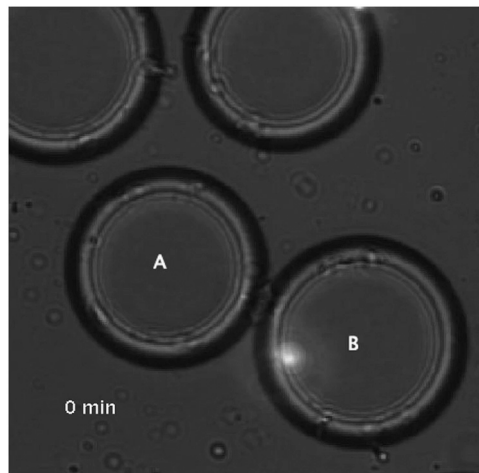

**Movie S3.** Osmotic ripening: model experiment with ethanol. A 50 g/L glucose-containing droplet (Left) is brought in contact with a droplet (Right) containing the same amount of salt and glucose but with 1 M of ethanol. Ethanol equilibrates faster than water so that no volume change is observed.

[Movie S3 \(MOV\)](#)



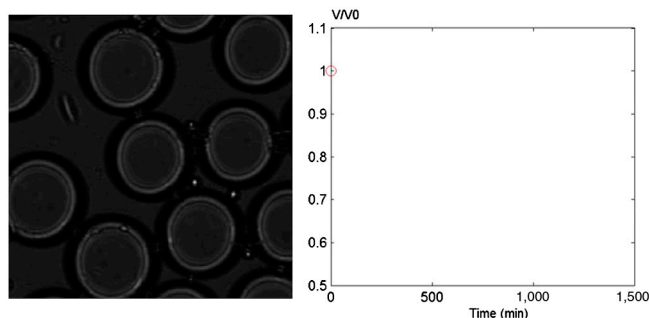

**Movie S4.** Osmotic ripening: bacteria experiment. An *Escherichia coli* cell is encapsulated in M9 medium containing 45 g/L of glucose. After a small increase in volume, the droplet is emptying itself in the surrounding nonoccupied droplets. The plot on the right side represents the normalized volume evolution of the bacteria-containing droplet.

[Movie S4 \(MOV\)](#)

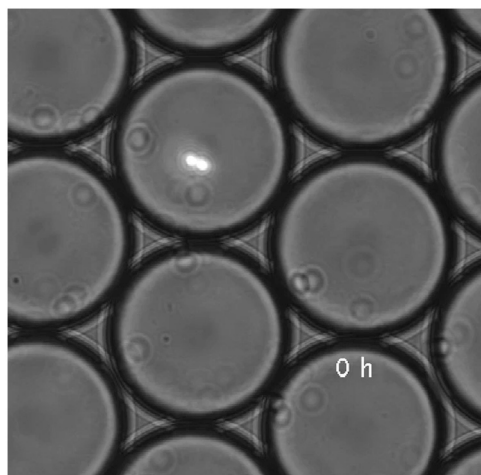

**Movie S5.** Osmotic ripening: enzyme experiment. A droplet containing BSA and protease *K* (highlighted by fluorescent beads) is brought in contact with droplets containing the same amount of BSA. As BSA is digested, the drop inflates.

[Movie S5 \(MOV\)](#)

**Table S1 Osmotic contraction at steady state for various glucose concentrations**

| Medium (SD)  | 1X-10 g/L | 1X-20 g/L | 1X-50 g/L | 1X-100 g/L | 1X-150 g/L | 1X-200 g/L |
|--------------|-----------|-----------|-----------|------------|------------|------------|
| $V_{ss}/V_0$ | 0.55      | 0.35      | 0.18      | 0.09       | 0.065      | 0.045      |

Values are the means over 100 nursing droplets. Coefficient of variation was 10%.

**Table S2. Strains used in this study**

| Name  | Ploidy | General background | Genotype                                                                                                                                                                   | Source                           |
|-------|--------|--------------------|----------------------------------------------------------------------------------------------------------------------------------------------------------------------------|----------------------------------|
| GY613 | 2N     | RM11-1a            | <i>MATa/MATalpha</i> leu2Δ0/leu2Δ0 ura3Δ0/ura3Δ0 hoΔ::KanMX/hoΔ::KanMX amn1-A1103T/amn1-A1103T HIS3::(natMX + Ppgk-yEGFP3)::HIS3/HIS3                                      | this work                        |
| GY814 | 2N     | S288c              | <i>MATa/MATa</i> his3Δ1/his3Δ1 leu2Δ0/leu2Δ0 lys2Δ0/LYS2 met15Δ0/MET15 ura3Δ0/ura3Δ0                                                                                       | M. Aigle, derived from ref. 1.   |
| GY815 | 4N     | S288c              | <i>MATa/MATa/MATalpha/MATalpha</i> his3Δ1/his3Δ1/his3Δ1/his3Δ1 leu2Δ0/leu2Δ0/leu2Δ0/leu2Δ0 lys2Δ0/LYS2/lys2Δ0/LYS2 met15Δ0/MET15/met15Δ0/MET15 ura3Δ0/ura3Δ0/ura3Δ0/ura3Δ0 | M. Aigle, derived from ref. 1.   |
| GY816 | 3N     | S288c              | <i>MATalpha/MATalpha/MATa</i> his3Δ1/his3Δ1/his3Δ1 leu2Δ0/leu2Δ0/leu2Δ0 lys2Δ0/LYS2/LYS2 met15Δ0/MET15/met15Δ0 ura3Δ0/ura3Δ0/ura3Δ0                                        | M. Aigle, derived from ref. 1.   |
| GY880 | 1N     | A364a              | <i>MATalpha</i> cdc28-4                                                                                                                                                    | N. Grandin, derived from ref. 2. |

1 Storchova Z, et al. (2006) Genome-wide genetic analysis of polyploidy in yeast. *Nature* 443:541–547.

2 Reed SI, Hadwiger JA, Lorincz AT (1985) Protein kinase activity associated with the product of the yeast cell division cycle gene CDC28. *Proc Natl Acad Sci USA* 82:4055–4059.
